# Supplementary material
Source: PubMed Central journal article supplement (PMC3790638)
Supplement: NIHMS508140-supplement-01.pdf [file NIHMS508140-supplement-01.pdf]

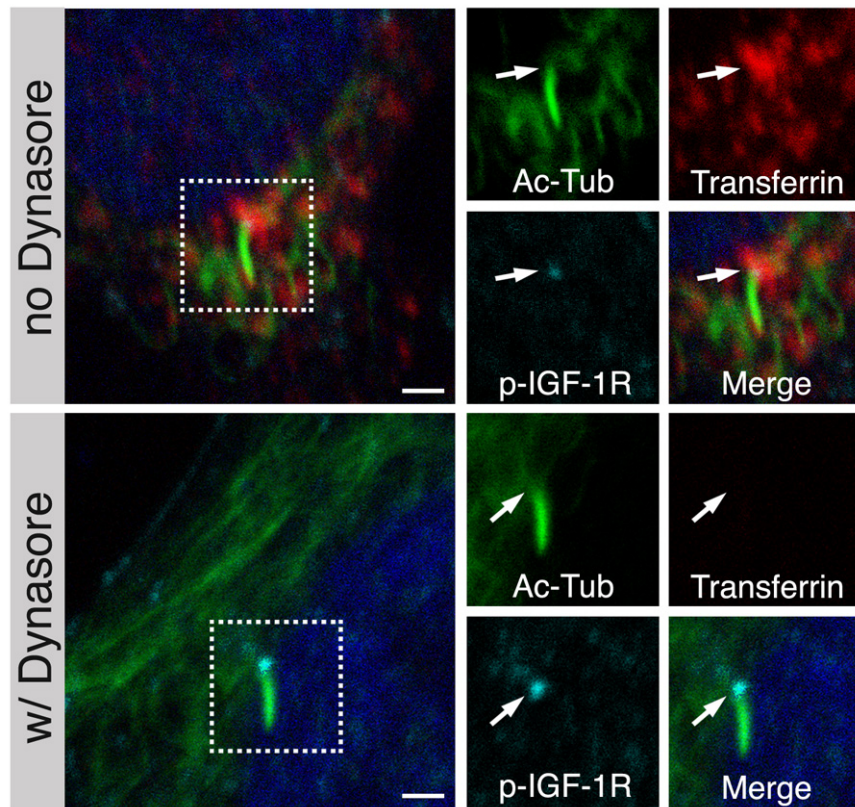

**Fig. S1** (related to Fig. 1): RPE-1 cells were starved for 48 hr, and then treated with dynasore (100  $\mu$ M, Sigma) for 2 hr before adding IGF-1 and Alexa-594 conjugated transferrin (6  $\mu$ g/mL Invitrogen) for 2 additional hours. Top: In control cells (no dynasore), a subset of incorporated transferrin (red) was distributed to endosomes near the ciliary base, as previously reported (Kim et al., 2010). Bottom: Dynasore treatment effectively blocked the endocytosis of transferrin without affecting the ciliary base distribution of phospho-IGF-1R (cyan, arrows).

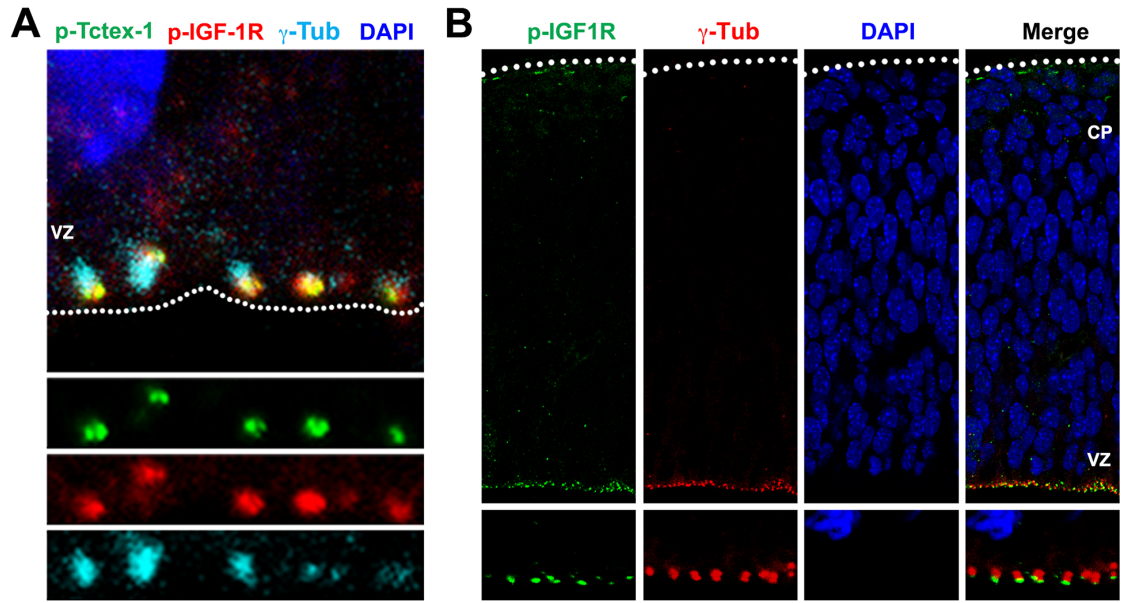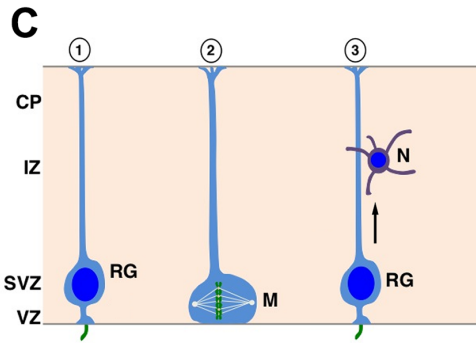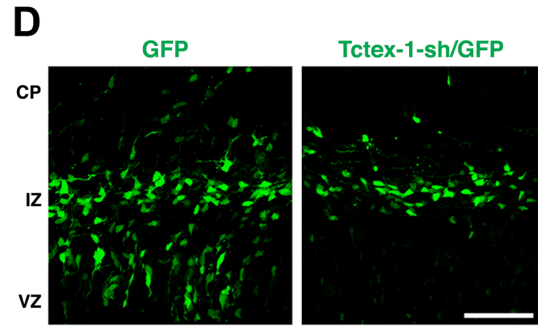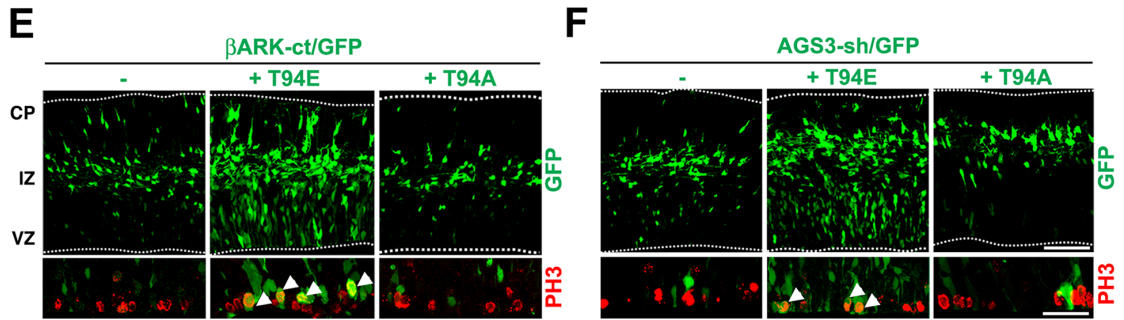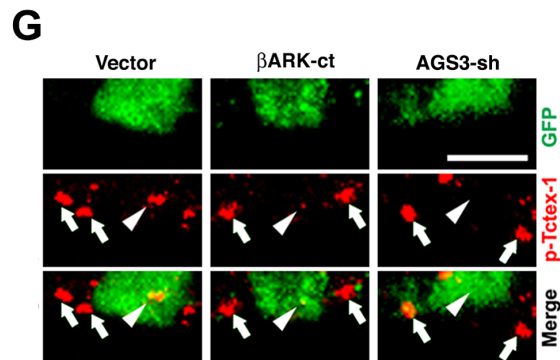

**Fig. S2** (related to Fig. 5): (A) Confocal images of the ventricle border of a cortical slice co-labeled with phospho(T94)Tctex-1 (green), phospho-IGF-1R (red), and  $\gamma$ -Tub (cyan). (B) Representative confocal image of E13 cortical slice labeled with phospho-IGF-1R (green),  $\gamma$ -Tub (red), and DAPI (blue). The zoom-in images of the ventricle borders are also shown (bottom panels). Activated IGF-1R was especially concentrated near the basal bodies of almost all RG apical endfeet. (C) Schematic diagram of the radially elongated RG, mitotic cells (M) at ventricular border and multipolar post-mitotic neurons (N) at IZ. CP: cortical plate. (D) Cortical slices transfected with GFP or Tctex-1-sh/GFP. (E) Representative images transfected with  $\beta$ ARK-ct alone or together with T94E, or T94A Tctex-1 (top); arrowheads point to P-H3-labeled, mitotic GFP-positive cells at the VZ (bottom). (F) Cortical slices transfected with AGS3-sh alone or together with T94E, or T94A Tctex-1 (top); P-H3-labeled, mitotic GFP-positive cells at the VZ are marked by arrowheads (bottom). (G) Representative images of the phospho(T94)Tctex-1 immunolabeling in the VZ of the cortical slices 24 hr after transfection of indicated plasmid. Arrowheads and arrows point to GFP-positive transfected cells and their neighboring non-transfected cells, respectively. Scale bars: 100  $\mu$ m (D, top panel in F), 50  $\mu$ m (bottom panel in F), 5  $\mu$ m (G).

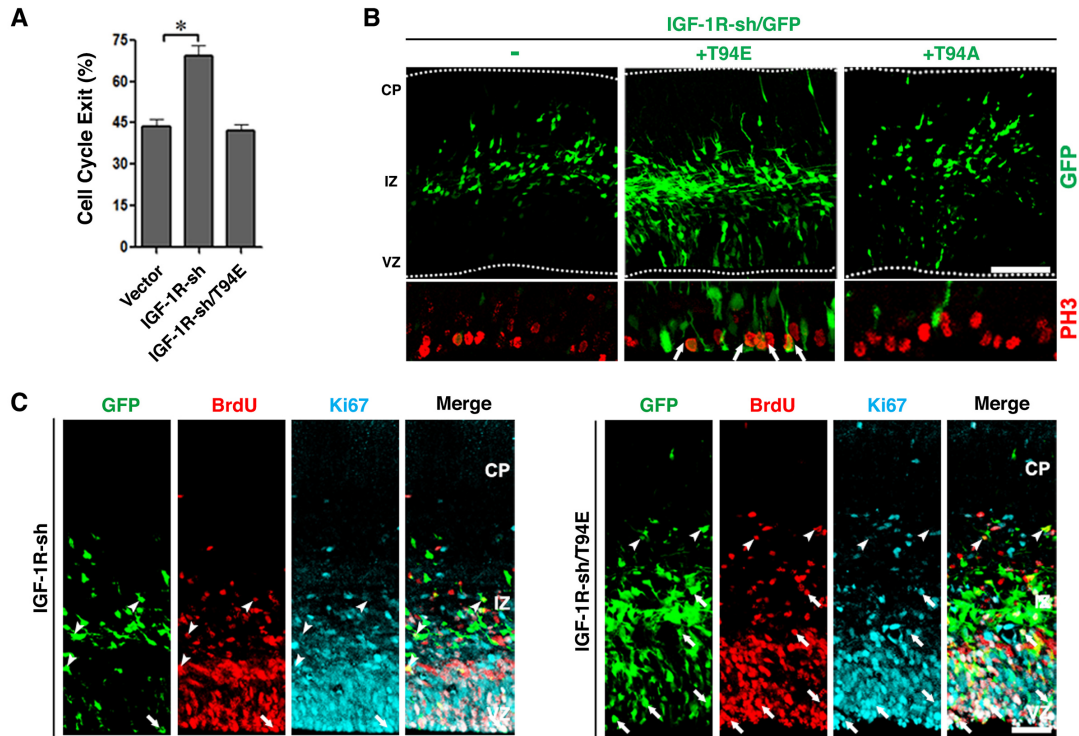

**Fig. S3** (related to Fig. 5): (A) Cell cycle exit index. Fractions of GFP<sup>+</sup>/BrdU<sup>+</sup>/Ki67<sup>-</sup> cells out of total GFP<sup>+</sup>/BrdU<sup>+</sup> cells are listed as means ± SEM. Data are presented as mean ± SEM (\*p<0.05; *t*-test). (B) Cortical slices transfected with IGF-1R-shRNA/GFP, with (+) or without (-) T94E or T94A plasmid were labeled with PH3 (bottom panels). Arrows point to the GFP<sup>+</sup> transfected cells that are also PH3<sup>+</sup>. (C) Representative images of cortical slices harvested from animals subjected to the cell cycle exit assay, followed by triple labeling. Arrows point to cells that are GFP<sup>+</sup>, Ki67<sup>+</sup>, and BrdU<sup>+</sup>. Arrowheads point to GFP<sup>+</sup>/BrdU<sup>+</sup>/Ki67<sup>-</sup> cells. Scale bars: 100 μm (B), 50 μm (C).

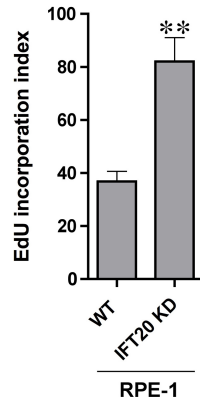

**Fig. S4** (related to Fig. 3): Quantification of S phase entry, measured by the EdU incorporation of indicated cells treated with serum after 48 hr starvation. The highest % of IFT20KD EdU<sup>+</sup> cells (n=3) was taken to be 100%. Data are presented as mean ± SEM (\*\*p<0.01; one-way ANOVA; n=3 experiments).

## References

Kim, J., Lee, J.E., Heynen-Genel, S., Suyama, E., Ono, K., Lee, K., Ideker, T., Aza-Blanc, P., and Gleeson, J.G. (2010). Functional genomic screen for modulators of ciliogenesis and cilium length. *Nature* *464*, 1048-1051.
